# Supplementary material for: Inhibition of Dermatophyte Fungi by Australian Jarrah Honey
Source: PubMed Central journal article supplement (PMC7918412; doi:10.3390/pathogens10020194), 2021-02-11
Supplement: pathogens-10-00194-s001.pdf [file pathogens-10-00194-s001.pdf]

**Table S1.** Estimated concentrations of H<sub>2</sub>O<sub>2</sub> in Jarrah (Barnes 10+) honey dilution series based on the HRP assay

| Honey concentration<br>[% (w/v)] | H <sub>2</sub> O <sub>2</sub> (μM) |
|----------------------------------|------------------------------------|
| 25                               | 448                                |
| 12.5                             | 224                                |
| 6.25                             | 112                                |
| 3.13                             | 56                                 |
| 1.56*                            | 28                                 |
| 0.78                             | 14                                 |
| 0.39                             | 7                                  |
| 0.2                              | 3.5                                |
| 0.1                              | 1.75                               |

\*MIC for *T. rubrum*
